# Supplementary material for: Microenvironment-responsive release of Mg2+from tannic acid decorated and multilevel crosslinked hydrogels accelerates infected wound healing
Source: Royal Society of Chemistry journal article supplement (doi:10.1039/d4tb01000k), 2024-01-01
Supplement: d4tb01000k1.pdf [file d4tb01000k1.pdf]

1

## Supporting Information for

2 Microenvironment-responsive release of Mg<sup>2+</sup> from tannic  
3 acid decorated and multilevel crosslinked hydrogel  
4 accelerates infected wound healing

5 *Na Li<sup>1,2,3</sup>, Yi Cao<sup>1,2</sup>, Jingyi Liu<sup>1,2</sup>, Wen Zou<sup>1,2,3</sup>, Manyu Chen<sup>1,2</sup>, Hongfu Cao<sup>1,2</sup>, Siyan*  
6 *Deng<sup>1,2</sup>, Jie Liang<sup>1,2,3</sup>, Tun Yuan<sup>1,2,3</sup>, Yujiang Fan<sup>1, 2\*</sup>, Qiguang Wang<sup>1,2\*</sup>, Xingdong*  
7 *Zhang<sup>1,2</sup>*

8 <sup>1</sup> National Engineering Research Center for Biomaterials, Sichuan University, 29#  
9 Wangjiang Road, Chengdu, Sichuan, 610064, China.

10 <sup>2</sup> College of Biomedical Engineering, Sichuan University, 29# Wangjiang Road,  
11 Chengdu, Sichuan 610064, China.

12 <sup>3</sup> Sichuan Testing Center for Biomaterials and Medical Devices, Sichuan University,  
13 29# Wangjiang Road, Chengdu 610064, China.

14

15 Corresponding authors:

16 \* Yujiang Fan      email: fan\_yujiang@scu.edu.cn

17 \* Qiguang Wang      email: wqgwang@126.com

18

19

20

21

22

## 23 **Material and Methods**

### 24 *Physicochemical Analysis*

25           The molecular composition of OHA and OHA-P was examined by Nuclear  
26 Magnetic Resonance ( $^1\text{H}$  NMR, 400 MHz, Bruker AMX-400, USA). The structural  
27 integrity of the hydrogel was assessed by Attenuated Total Reflection Fourier  
28 Transform Infrared Spectroscopy (ATR-FTIR, Nicolet 6700, Thermo Electron  
29 Corporation, USA) within the range of 4000-500  $\text{cm}^{-1}$ . The microstructure of the OHA-  
30 P-TA/G hydrogels was visualized using Scanning Electron Microscopy (SEM,  
31 HITACHI S-800, Japan). Images were analyzed by using Image J software.

32           The prepared hydrogels were subjected to dynamic mechanical analyzer (DMA)  
33 (TA, Q800, USA) for force testing. The storage modulus ( $G'$ ) and loss modulus of the  
34 three hydrogels were tested at 1 Hz, 2 Hz, 5 Hz, 10 Hz, 40 Hz, 60 Hz, 80 Hz and 100  
35 Hz, respectively, the energy storage modulus ( $G'$ ) and loss modulus ( $G''$ ) of the  
36 hydrogels were tested at room temperature. The specific test parameters include: pre-  
37 compressive stress of 0.005 N, amplitude of 40  $\mu\text{m}$ , dynamic-static force ratio of 105%.

38           The rheological properties of the disk-shaped hydrogels (25 mm  $\times$  1 mm) were  
39 evaluated at ambient temperature using a rheometer (TA, HR20, USA). The storage  
40 modulus ( $G'$ ) and the loss modulus ( $G''$ ) varied over time when UV irradiation  
41 commenced after a duration of 30 s and was documented for 100 s. With constant strain  
42 amplitude of  $\gamma = 0.5\%$ , The storage modulus ( $G'$ ) and the loss modulus ( $G''$ ) varied  
43 over frequency range between 0.1 and 10 Hz. The viscosity changes of the four  
44 hydrogels were tested at 37  $^{\circ}\text{C}$ . The specific parameters of the test included: the time  
45 of taking points was from the steady state, the shear rate from 0.1 to 10 (1/s). The  
46 modulus varied over oscillating shear stress change (1%-760%).

47 The mechanism of interaction of OHA-P-TA/G/Mg<sup>2+</sup> was studied by X-ray  
48 photoelectron spectroscopy (XPS) (Kratos AXIS ULTRA DLD). C<sub>1s</sub> binding energy  
49 (284.6eV) was selected as the standard for energy correction.

50 The phase composition of the samples was scrutinized using X-ray diffraction (XRD,  
51 X'Pert Pro MPD DY129, PANalytical), employing a step duration of 1 s within the 2θ  
52 range of 20° to 80°.

53 The thermostability of the modified OHA-P-TA/G/Mg<sup>2+</sup> hydrogel was assessed  
54 using a thermal gravimetric analyzer (TG 209 F3, Netzsch), with a heating rate of 10  
55 °C/min from room temperature to 400 °C in an air flow.

56 Differential scanning calorimetry (DSC) was adopted to test crystallinities of OHA-  
57 P-TA/G/Mg<sup>2+</sup> hydrogel from 50 °C to 400 °C at a rate of 20 °C/min under an Argon  
58 atmosphere with a flow rate of 50 ml/min.

59 The EDS mapping for the Mg elements of the OHA-P-TA/G and OHA-P-  
60 TA/G/Mg<sup>2+</sup> was carried out using SEM. The porosity and pore size distribution curve  
61 were determined through the mercury intrusion technique (AutoPore 9500,  
62 Micromeritics).

### 63 *Hydrogel Swelling Analysis*

64 The equilibrated swelling ratios of the composites were calculated. In brief, the  
65 initial weight of disk-shaped hydrogels (10 mm × 1 mm) (W<sub>0</sub>) was recorded and then  
66 completely submerged in 10 mL PBS solution (pH 7.4) and acidic (pH 4.5) at 37 °C  
67 with shaking at 100 rpm. The gel block was carefully pipetted with filter paper to  
68 remove the surface solution was weighed (W<sub>t</sub>), at various time intervals (30, 60, 120,  
69 240, 480, and 720 h) until the hydrogels reached swelling equilibrium. The swelling  
70 ratio SRs was calculated using the following equation:

$$71 \text{ Swelling ratio (\%)} = (W_t - W_0) / W_0 \times 100\%$$

### 72 *In vitro Degradation Analysis*

73 The remaining weight ratio of the composites was calculated. In brief, the initial  
74 weight of disk-shaped hydrogels (10 mm × 1 mm) ( $W_0$ ) was recorded and then  
75 completely submerged in 10 mL PBS solution (pH 7.4) and acidic (pH 4.5) at 37°C  
76 with shaking at 100 rpm. The samples were completely dried and weighed ( $W_t$ ) at  
77 various time intervals (0, 1, 2, 3, 4, 5, and 6 days). The *in vitro* remaining ratio was  
78 computed using the following formula:

79 
$$\text{Remaining ratio (\%)} = (W_t / W_0) \times 100\%$$

### 80 *Investigation of TA and Mg<sup>2+</sup> Release Characteristics*

81 Briefly, 0.1 g of the dried hydrogels were submerged in 5 mL of various  
82 solutions and placed into a shaker incubator at 100 rpm at 37 °C. At pre-determined  
83 time points, 1 mL of the hydrogels' release media was removed and substituted with 1  
84 mL of fresh PBS solution to keep the overall volume of the release medium steady (5  
85 mL). The cumulative concentration of TA released from the hydrogels was measured  
86 in accordance with the calibration curve and UV-vis spectroscopy at 278 nm.

87 The OHA-TA/G/Mg<sup>2+</sup> hydrogel was submerged in 5 mL of various solutions  
88 (pH 7.4, 4.5, 9.0), and the solution was subjected to shaking at 120 rpm at a temperature  
89 of 37 °C for a duration of 2 days. At specific time intervals, 1 mL of the solution was  
90 extracted to gauge the quantity of Mg<sup>2+</sup> released, and an equal volume of fresh PBS  
91 was supplemented.

### 92 *Intracellular Reactive Oxygen Species (ROS) Level*

93 The intracellular ROS level was assessed using a fluorometric intracellular ROS  
94 Kit (Beyotime Biotechnology, S0033). To summarize,  $1 \times 10^4$  L929 cells were seeded  
95 in 24-well plates and a cellular oxidative damage model was established using 100 μM  
96 H<sub>2</sub>O<sub>2</sub>. Following this, the cells underwent treatment with each hydrogel extracts for a  
97 period of 24 h. For the negative control (NC) group, the cells were solely treated with  
98 a complete medium. For the positive control (PC) group, the cells were treated with a  
99 complete medium contained 100 μM H<sub>2</sub>O<sub>2</sub>, loading DCFH-DA probe. Afterward, the  
100 fluorescence signal image was captured using a fluorescence microscope post a 20 min

101 incubation with the DCFH-DA probe. The expression of ROS mean fluorescence  
102 intensity was quantified using Image J software.

### 103 ***ABTS Radical Scavenging***

104 The stock solutions comprised a 7.4 mM ABTS<sup>+</sup> solution and a 2.6 mM  
105 potassium persulfate solution. The operational solution was subsequently formulated  
106 by combining equal amounts of the two base solutions and permitting them to interact  
107 for a duration of 12 h at ambient temperature in a dark environment. The solution was  
108 then diluted using PBS to achieve an absorbance of  $0.7 \pm 0.02$  units at 734 nm, as  
109 measured by the microplate reader. A fresh ABTS<sup>+</sup> solution was formulated for each  
110 test. The hydrogels were subjected to a reaction with 100  $\mu$ L of the ABTS<sup>+</sup> working  
111 solution for a duration of 30 min in a dark environment. The absorbance was measured  
112 at 734 nm utilizing the microplate reader (Spectra MaxM2, Molecular Devices,  
113 Sunnyvale, CA, USA).

114 The ABTS Radical Scavenging (%) was calculated as  $= (A - A_0) / A \times 100\%$

115 where A represented the absorption of the blank (solely the ABTS<sup>+</sup> ethanol solution)  
116 and  $A_0$  denoted the absorption of the sample.

### 117 ***DPPH Radical Scavenging Activity***

118 The DPPH radical scavenging activity of the hydrogels was assessed following  
119 a method outlined in an earlier research.<sup>1</sup> Each hydrogel was combined with 0.2 mL of  
120 a 0.4 mM DPPH ethanol solution for a duration of 10 min. Subsequently, the  
121 wavelength of DPPH was scanned using a UV-vis spectrophotometer at 517 nm. The  
122 DPPH scavenging was computed using the subsequent formula:

$$123 \quad \text{DPPH scavenging (\%)} = (A_0 - A_1) / A_0 \times 100\%$$

124 Where  $A_0$  represents the absorption of the blank (solely the DPPH ethanol solution) and  
125  $A_1$  denotes the absorption of the sample.

### 126 ***Antibacterial Properties***

127 The antibacterial properties of each hydrogel were assessed using Escherichia  
128 coli (*E. coli*, ATCC 25922) and Staphylococcus aureus (*S. aureus*, ATCC 25923). In

129 brief, a single bacterial colony was grown in 10 mL of Tryptic Soy Broth (TSB) and  
130 incubated at a temperature of 37 °C for a duration of 12 h. Following this,  $1 \times 10^4$  CFUs  
131 in 1 mL of bacterial suspensions were evenly combined with each sterilized hydrogel  
132 and cultivated statically. After a period of 12 h, the mixed culture solution was diluted  
133 by a factor of  $10^5$  and uniformly spread onto Tryptone Soy Agar (TSA), followed by  
134 an incubation period of 24 h. Subsequently, the count of individual colonies in each  
135 group was documented. The bacterial survival rate was calculated using the following  
136 formula:

$$137 \quad \text{Antibacterial rate (\%)} = N_0 / N_1 \times 100\%$$

138 where  $N_1$  represents the bacterial count for each hydrogel and  $N_0$  represents the  
139 bacterial count for the control group with only bacterial suspension.

140 The agar diffusion assay was employed to measure the antibacterial ability in  
141 the surface diffusion of the hydrogel by analyzing the zone of inhibition (ZOI). Briefly,  
142 200  $\mu$ L suspension of bacteria at  $1 \times 10^6$  CFUs/mL concentration was evenly plated  
143 onto TSA. After that, each sterile hydrogel of the same size was attached to the center  
144 of the TSA, cultured statically at 37 °C, and photographed at a specific time to quantify  
145 the size of antibacterial belt's outer diameter.

#### 146 ***Cytotoxicity and Cell Proliferation***

147 L929 cells were employed to examine the direct and indirect cytocompatibility  
148 of the hydrogels. The cells were cultivated in Dulbecco's Modified Eagle Medium  
149 (DMEM) that contained 10% fetal bovine serum and were placed in an incubator at a  
150 temperature of 37 °C with 5% CO<sub>2</sub>. The hydrogel extract was prepared by submerging  
151 sterile disk-shaped hydrogels (10 mm  $\times$  1 mm) in 1 mL of serum-free medium for 24  
152 h. We co-cultured each group of hydrogel extracts with L929 cells for 1, 3, and 5 days,  
153 respectively, and then performed FDA/PI staining and Cell Counting Kit-8 (CCK-8,  
154 Beyotime, Shanghai, China) assay to measure the optical density (OD) of the solution  
155 at 450 nm.

#### 156 ***Cell Migration***

157 The migration of cells was assessed using a cell scratch assay treatment with  
158 each hydrogel extracts with 100  $\mu\text{M}$   $\text{H}_2\text{O}_2$  induced L929 cells. Firstly,  $1 \times 10^5$  of L929  
159 cells were grown in the complete medium until they achieved 80% confluence, at which  
160 point a scratch was created using a sterile 200  $\mu\text{L}$  pipette tip. Following this, the sterile  
161 hydrogel extracts and cells were co-cultured in a state of serum deprivation, with the  
162 control group being treated solely with serum-free medium. The scratch of cells was  
163 imaged using an inverted microscope at 0 and 24 h respectively. The rate of migration  
164 was computed using the subsequent formula:

165 
$$\text{Migration rate (\%)} = (A_0 - A_1) / A_0 \times 100\%$$

166 where  $A_1$  represents the scratch width after sample treatment and  $A_0$  represents the  
167 initial scratch width.

#### 168 ***Tube Formation Assay***

169 The ability to form tubes was assessed using Matrigel Matrix (Corning, 356231, US)  
170 following a previously described method.<sup>2</sup> A volume of 50  $\mu\text{L}$  of Matrigel was  
171 introduced into pre-cooled 96-well plates and then incubated at a temperature of 37  $^\circ\text{C}$   
172 in a 5%  $\text{CO}_2$  environment for a duration of 1 h. HUVECs ( $2 \times 10^4$  cells), which had  
173 undergone pre-treatment with different hydrogel extracts for a period of 48 h, along  
174 with HUVECs that were not subjected to any treatment, were then planted in the plates.  
175 Following a period of 10 h, the formation of tubules was visually inspected using an  
176 optical microscope, and the count of meshes per field was quantified using Image J  
177 software.

#### 178 ***Hemolysis assay***

179 The hemolysis assay was conducted as outlined in a prior study, albeit with a few  
180 modifications. In brief, selected healthy extracted fresh rabbit blood, every 10 mL fresh  
181 rabbit blood add 2% potassium oxalate solution 0.5 mL, gently mixed, made of fresh  
182 anticoagulated rabbit blood, placed in 4  $^\circ\text{C}$  conditions, within 48 h use. Add about  
183 10mL of 0.9% sodium chloride injection to every 8 mL of fresh anticoagulated rabbit

184 blood to make diluted anticoagulated rabbit blood. Centrifuge the arterial blood in the  
185 anticoagulated tube at 1500 rpm for 15 min, remove the upper layer of plasma and retain  
186 the lower layer of blood cell precipitate, and then resuspend it twice by adding 0.9%  
187 NaCl to achieve a 4% (v/v) solution. The hydrogel was introduced into the 0.9% NaCl  
188 solution, which was then combined with the 4% (v/v) solution in equal volumes and  
189 incubated at 37 °C for 1 h. Following this, the supernatant (A) was subjected to  
190 centrifugation and its absorbance was gauged at 450 nm. PBS (A<sub>n</sub>) and 0.1% Triton-  
191 X100 (A<sub>p</sub>) were incorporated as the negative and positive controls, respectively. The  
192 hemolysis rate was computed using the formula: Hemolysis rate (%) = (A - A<sub>n</sub>) / (A<sub>p</sub> -  
193 A<sub>n</sub>) × 100%

#### 194 *Anti-Inflammatory Capability*

195 RAW 264.7 macrophages were incubated for 12 h in DMEM containing  
196 lipopolysaccharide (LPS, 1 µg/mL), after which they were incubated with various  
197 hydrogel extracts. The intracellular level of NO was detected by DAF-FM DA  
198 (Beyotime S0019S) and Nitric oxide NO content test kit (Shanghai Enzyme-linked  
199 Biotechnology, 287810).

#### 200 *Regulation of Macrophage Phenotype*

201 RAW 264.7 macrophages (1 × 10<sup>6</sup> cells) that had undergone pre-treatment with LPS  
202 for a duration of 12 h were subjected to incubation with a variety of extracts of hydrogel  
203 in 6-well plates. Following an incubation period of 24 h, the cells were collected  
204 through centrifugation and rinsed twice using cold PBS. The treated cells were then  
205 stained with FITC-tagged anti-CD86 antibodies and APC-tagged CD206 as per the  
206 instructions provided by the manufacturer, and subsequently analyzed using flow  
207 cytometry (BD Biosciences). The data was processed using FlowJo software (Tree  
208 Star).

#### 209 *Immunofluorescence Test*



210 RAW264.7 cells were propagated in DMEM enriched with 10% FBS and 1% PS.  
211 RAW 264.7 macrophages ( $1 \times 10^6$  cells) that had undergone pre-treatment with LPS  
212 for a duration of 12 h were subjected to incubation with a variety of extracts of hydrogel  
213 in 6-well plates. After fixing the cells, the primary antibody (INOS and CD206+) was  
214 added and incubated for 0.5 h. Upon three times washing, the secondary antibody was  
215 added and incubated for 1 h, followed by DAPI staining and observation.

#### 216 *PCR Analysis*

217 RAW 264.7 macrophages ( $2 \times 10^5$  cells) that had been pre-treated with LPS (1  
218  $\mu\text{g/mL}$ ) for a duration of 12 h. Following a period of 24 h incubated with extracts from  
219 the hydrogel in 6-well plates, the cells were gathered, the RNA extraction was carried  
220 out using the RNeasy Mini kit (Qiagen) as per the guidelines provided by the  
221 manufacturer, after which it was transformed into cDNA using the iScript™ cDNA  
222 Synthesis Kit (Bio-Rad, USA). qPCR analysis was conducted using SYBR Green  
223 (Roche, USA) on a C1000™ Thermal cycler machine (Bio-Rad, USA). The relative  
224 levels of gene expression were computed using the  $2^{-\Delta\Delta\text{CT}}$  formula.  $\beta$ -Actin mRNA was  
225 utilized for PCR amplification, and quantitative real-time PCR was used to ascertain  
226 the mRNA expression. The sequences of the primers (5'-3') employed in this research  
227 are listed in in Table S1.

#### 228 *In vivo Wound Healing*

229 The infected mice were randomly divided into four groups: control group (n=6),  
230 OHA-P/G group (n=6), OHA-P-TA/G group (n=6) and OHA-P-TA/G/Mg<sup>2+</sup> group  
231 (n=6). After infecting 1 day, hydrogel precursor solutions were injected into the wound  
232 and then blue light (15 mW) for a duration for 60 s, the control group was treated  
233 commercial Tegaderm film. The wounds were then treated with iodophor disinfection  
234 with commercial Tegaderm film, the dressings were changed every three days. The  
235 progression of the wounds was documented through photograph taken at day 0, 3, 6, 8,  
236 and 12, and the wound areas were quantified using Image J software.

237 
$$\text{Wound closure (\%)} = (A_0 - A_t) / A_0 \times 100\%$$

238 where  $A_t$  and  $A_0$  were the wound areas on day  $t$  and day 0, respectively.

### 239 *In vivo Antibacterial ability Test*

240 On day 2, infected tissue samples were gathered and meticulously mixed with 2 mL  
241 of TSB in a sterile environment. This mixture was then diluted by a factor of 1000x.  
242 The resulting bacterial suspension was spread onto TSA plates and incubated at a  
243 temperature of 37 °C for a period of 12 h. This process allowed for the formation of  
244 visible colony units.

### 245 *Immunohistochemistry and ELISA Test*

246 To evaluate the epidermal regeneration of the epidermal layer in wound tissue, mice  
247 were humanely euthanized at a specified time point. The wound tissues were then  
248 harvested and immersed in a 4% (vol/vol) solution of paraformaldehyde for a duration  
249 of 24 h. Following this, the tissues were dehydrated using a series of alcohols and  
250 subsequently embedded in paraffin. Each paraffin block was sectioned into slices of 4  
251  $\mu\text{m}$  thickness and stained using hematoxylin and eosin (H&E), Masson's trichrome,  
252 and immunohistochemistry for analysis (TNF- $\alpha$ , IL-6, IL-4, Ki67 and VEGF). The  
253 statistics of collagen deposition, the number of blood vessels, TNF- $\alpha$ , IL-6, IL-4, Ki67  
254 and VEGF were measured by Image J software. On the 6<sup>th</sup> day, the mice were  
255 euthanized and the orbital blood was collected and centrifuged for ELISA. Cytokines  
256 were measured by commercial ELISA kits (Jiangsu MEIMIAN): TNF- $\alpha$ , IL-6, IL-4 and  
257 VEGF, following the manufacturer's guidance.

### 258 *Histological Analysis*

259 The process of epidermal regeneration in wound tissues was evaluated using  
260 various staining techniques such as hematoxylin and eosin (H&E), Masson's trichrome,  
261 Sirius red staining, and immunohistochemical staining. The mice were humanely  
262 euthanized on day 6 and 12, post which the wound tissues were immersed in a 4%

263 paraformaldehyde solution for a duration of 24 h. Following this, the tissues  
 264 subsequently embedded in paraffin.

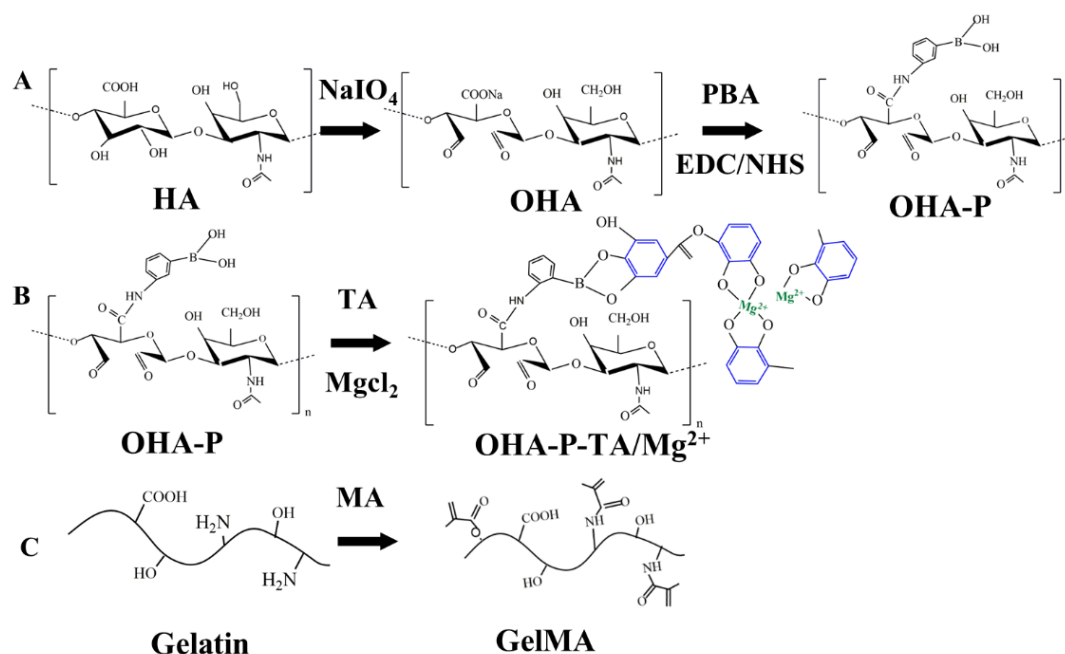

265

266 **Fig. S1. Synthetic route of OHA-P-TA/G/Mg<sup>2+</sup> hydrogel.** A. Synthetic route of  
 267 OHA-P. B. Synthetic route of OHA-P-TA and TA@Mg<sup>2+</sup>. C. Synthetic route of  
 268 GelMA.

269

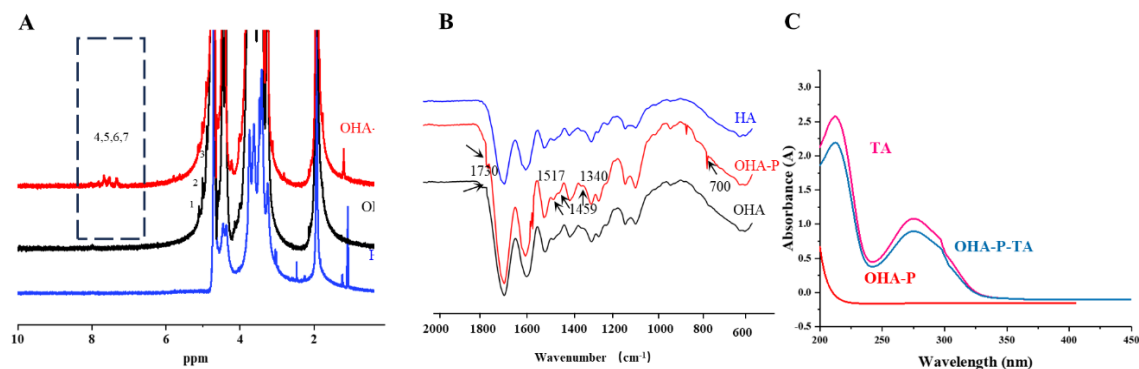

270

271 **Fig. S2. Characterization analysis.** A. <sup>1</sup>H NMR (D<sub>2</sub>O) spectra of HA, OHA and OHA-  
 272 P. B. The FTIR of HA, OHA and OHA-P. C. UV-vis absorption spectra of the aqueous  
 273 solution of TA, OHA-P and OHA-P-TA.

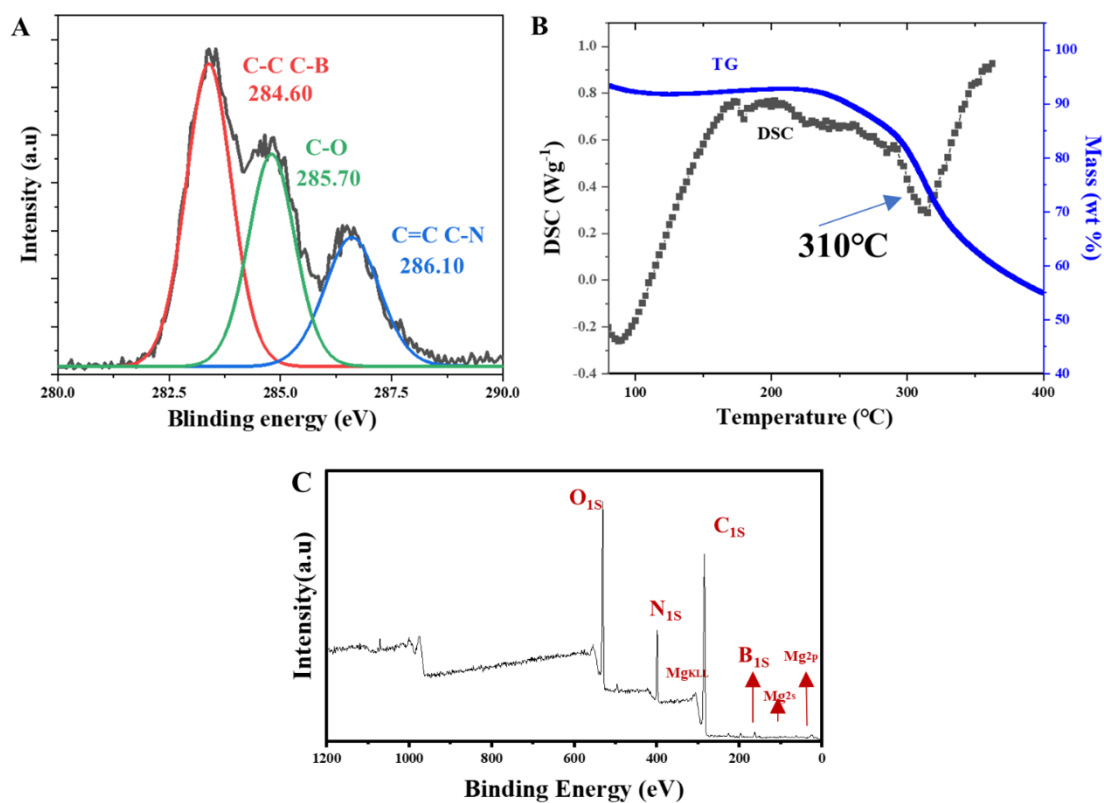

274

275

276 **Fig. S3. Characterization analysis of OHA-P-TA/G/Mg<sup>2+</sup>.** A. High-resolution XPS  
 277 spectra of C1s scan results of OHA-P-TA/G/Mg<sup>2+</sup>. B. TG and DSC results of OHA-P-  
 278 TA/G/Mg<sup>2+</sup>. C. XPS characterization of OHA-P-TA/G/Mg<sup>2+</sup> hydrogel.

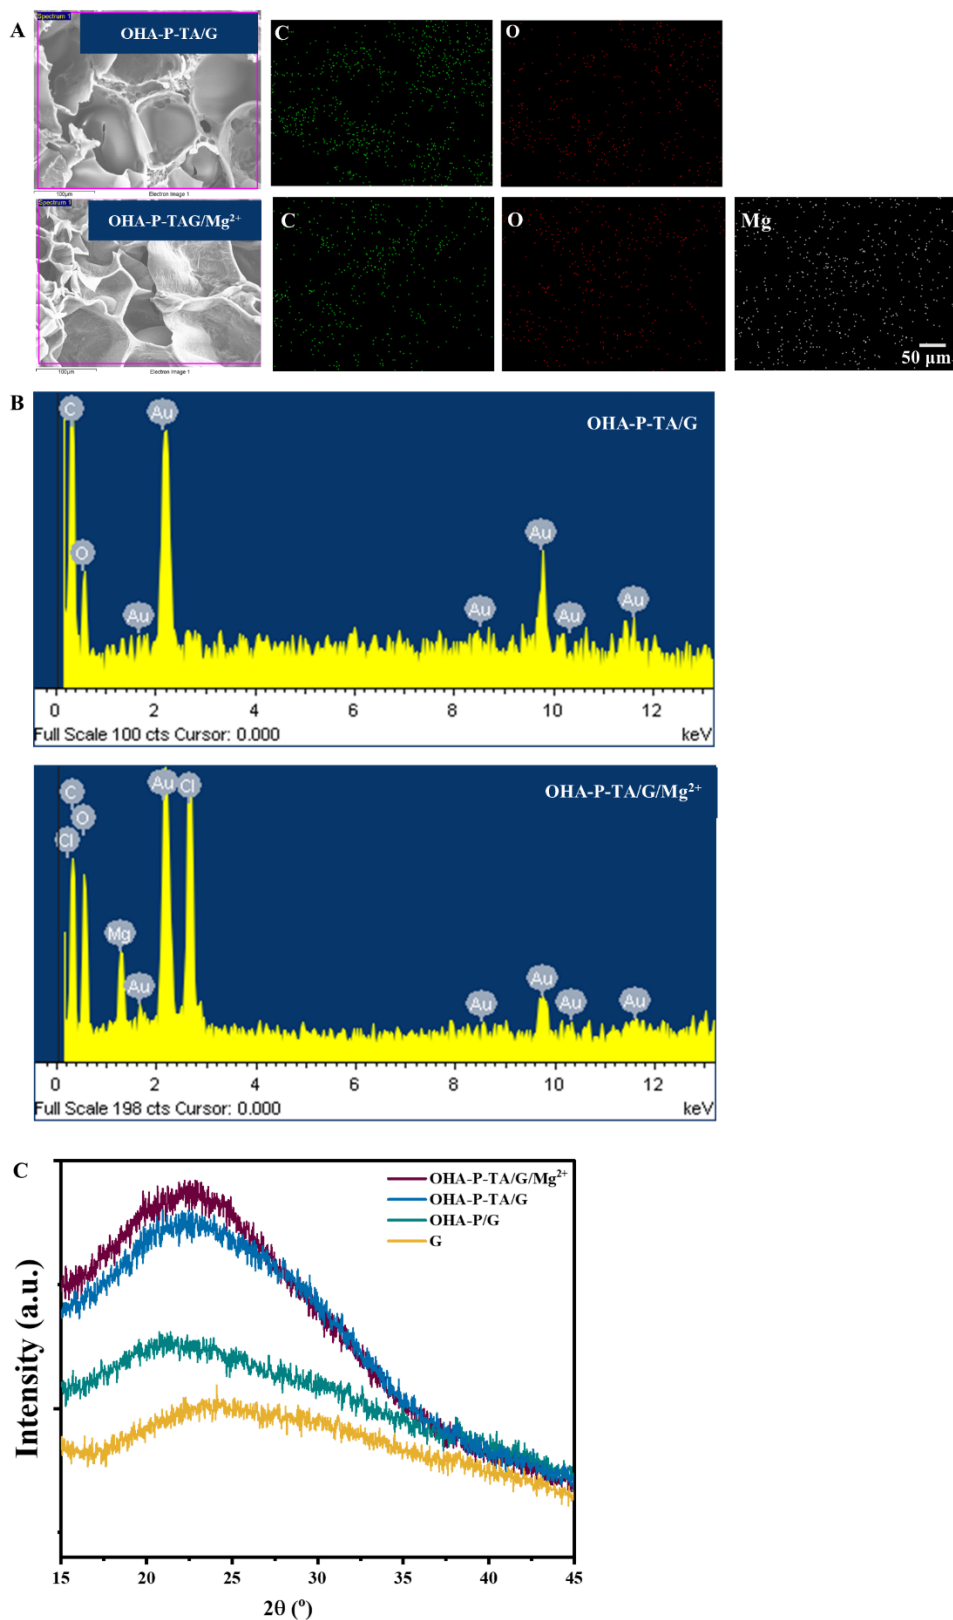

279  
 280 **Fig. S4. EDS analysis and XRD spectra.** A. Energy-dispersive spectrometry maps of  
 281 the OHA-P-TA/G and OHA-P-TA/G/Mg<sup>2+</sup> hydrogels; green, red, and white correspond  
 282 to elemental C, O and Mg respectively. B. Element spectrum. C. XRD spectra of the G,  
 283 OHA-P/G, OHA-P-TA/G and OHA-P-TA/G/Mg<sup>2+</sup> hydrogels.

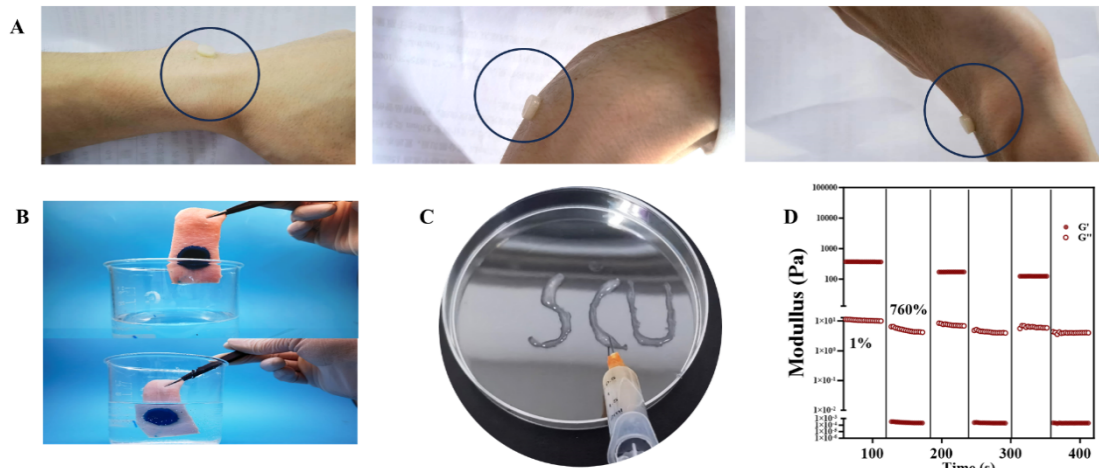

284

285 **Fig. S5. Characterization analysis of adhesive capacity, injectable property and**  
 286 **Self-healing ability.** A. Representation of hydrogels applied on the human wrist, at  
 287 varying angles. B. Images of hydrogels applied on skin tissue (from swine) with a shake  
 288 in PBS. C. The injectable ability of Hydrogels. D. The storage modulus (G') and loss  
 289 modulus(G'') of OHA-P-TA/G/Mg<sup>2+</sup> hydrogel when strain changes in alternating steps  
 290 between 1% and 760%.

291

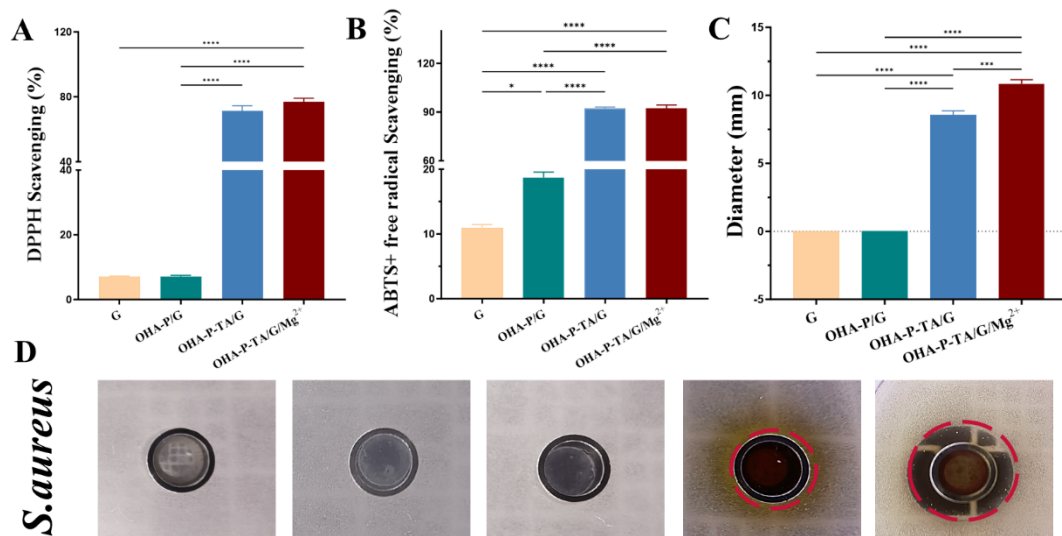

292

293 **Fig. S6. Antioxidant and bactericidal ability of hydrogels.** A. DPPH scavenging rate  
 294 by different components of the hydrogels. B. ABTS+ free radical scavenging rate by  
 295 different components of the hydrogels. C-D. The diameter of the inhibition ring of  
 296 various hydrogels. Data are shown as mean  $\pm$  SD, n = 3. \* $p$  < 0.05, \*\* $p$  < 0.01, \*\*\* $p$  <  
 297 0.001, \*\*\*\* $p$  < 0.0001.

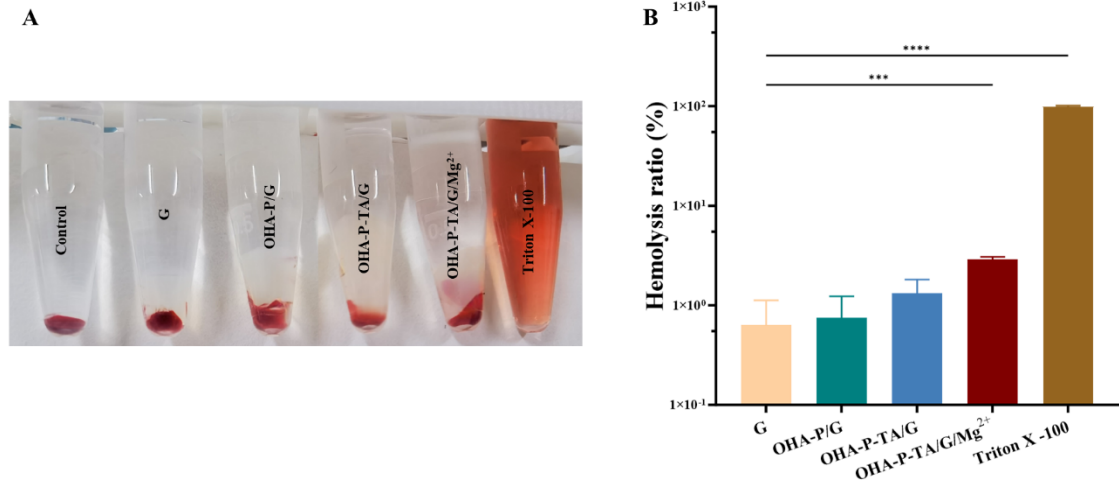

298

299 **Fig. S7. Biocompatibility of hydrogels.** A. Hemolytic photograph of PBS, different  
 300 hydrogels, and Triton. B. Statistical hemolysis ratio. Data are shown as mean  $\pm$  SD, n  
 301 = 3. \* $p$  < 0.05, \*\* $p$  < 0.01, \*\*\* $p$  < 0.001, \*\*\*\* $p$  < 0.0001.

302

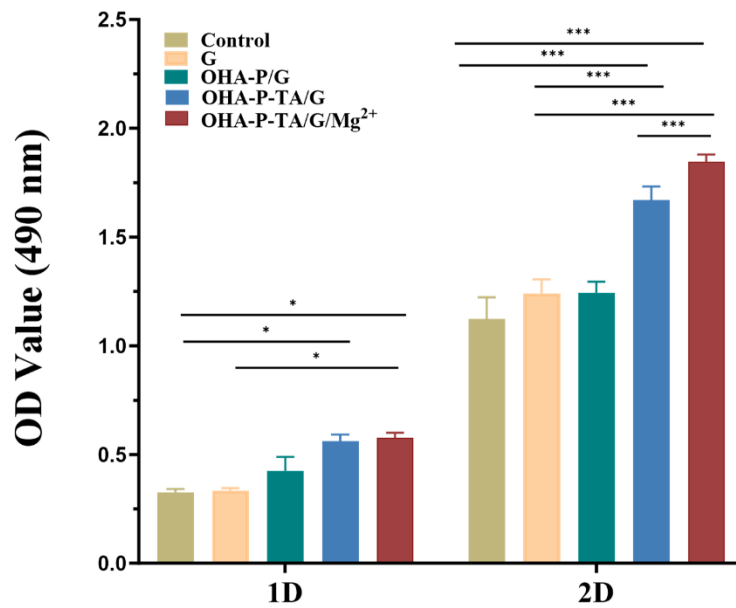

303

304 **Fig. S8. Cell viability of RAW 264.7 cells after incubated with the different**  
 305 **components of the hydrogels on day 1 and day 2.** Data are shown as mean  $\pm$  SD, n =  
 306 3. \* $p$  < 0.05, \*\* $p$  < 0.01, \*\*\* $p$  < 0.001, \*\*\*\* $p$  < 0.0001.

307

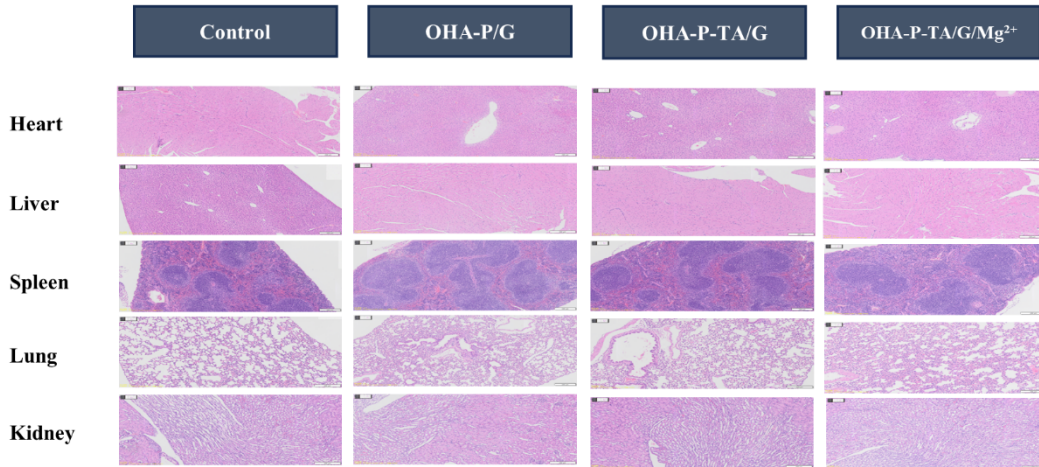

308  
 309 **Fig. S9. H&E staining of heart, liver, spleen, lung, and kidney treated with the**  
 310 **different the hydrogels on day 12 (scale bar: 200  $\mu$ m).**  
 311

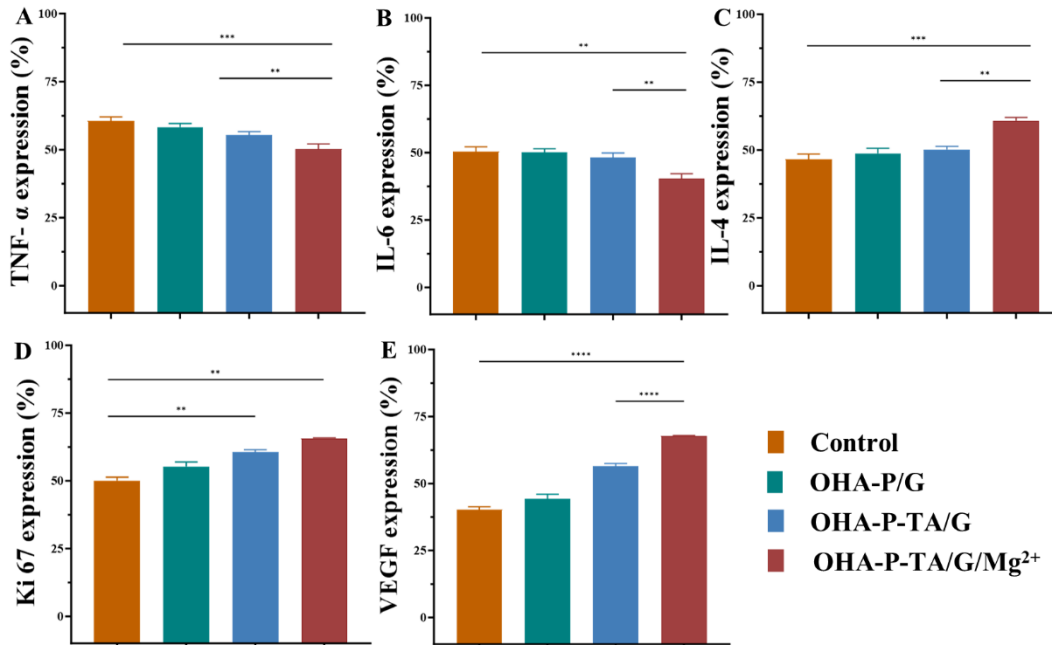

312  
 313 **Fig. S10. Semi-quantitative analysis of immunohistochemical staining.** A-E. The  
 314 semi-quantitative expression of TNF- $\alpha$ , IL-6, IL-4, Ki67 and VEGF of the reformed  
 315 epidermis in different groups on day 12. Data are shown as mean  $\pm$  SD, n = 3. \* $p$  <  
 316 0.05, \*\* $p$  < 0.01, \*\*\* $p$  < 0.001, \*\*\*\* $p$  < 0.0001.



317 **Table S1.** Primers used to amplify mRNAs encoding

318

| Primer           | Sequence (5'-3')        |
|------------------|-------------------------|
| GAPDH-F          | GGTGAAGGTCGGTGTGAACG    |
| GAPDH-R          | CTCGCTCCTGGAAGATGGTG    |
| NF-KB-F          | CCGGGAGCCTCTAGTGTAAT    |
| NF-KB-R          | TGCAAATCTGTTGCAAGGGG    |
| TNF- $\alpha$ -F | CAACGGCTTGTATGCTGGAC    |
| TNF- $\alpha$ -R | ACACCCTGGCAAGAGTTGTG    |
| IL-6-F           | GACAAAGCCAGAGTCCTTCAGA  |
| IL-6-R           | TGTGACTCCAGCTTATCTCTTGG |
| IL-4-F           | AAGGACTTCATCGGCCTTGG    |
| IL-4-R           | CTTTGGTGTGACTGCCACG     |
| MagT-F           | TCGGACCGTGCTGGAAGAAA    |
| MagT -R          | GCTGCTCCCGTGGATGTAAT    |
| STAT3-F          | TACACCAAGCAGCAGCTGAA    |
| STAT3-R          | CACTACCTGGGTCGGCTTC     |

319

320

321 **Reference**

322

- 323 1. K. H. Adolfsson, P. Huang, M. Golda-Cepa, H. Xu, A. Kotarba and M.  
324 Hakkarainen, Scavenging of DPPH by Persistent Free Radicals in Carbonized  
325 Particles, *Advanced Sustainable Systems*, 2023, **7**.
- 326 2. F. Li, X. Gou, D. Xu, D. Han, K. Hou, W. Fang and Y. Li, Improvement of tube  
327 formation model of cell: Application for acute hypoxia in in vitro study of  
328 angiogenesis, *Microvascular Research*, 2022, **140**, 104297.

329
